# Supplementary material
Source: PubMed Central journal article supplement (PMC5004644)
Supplement: ASN.2015040461SupplementaryData.pdf [file ASN.2015040461SupplementaryData.pdf]

## Supplementary files

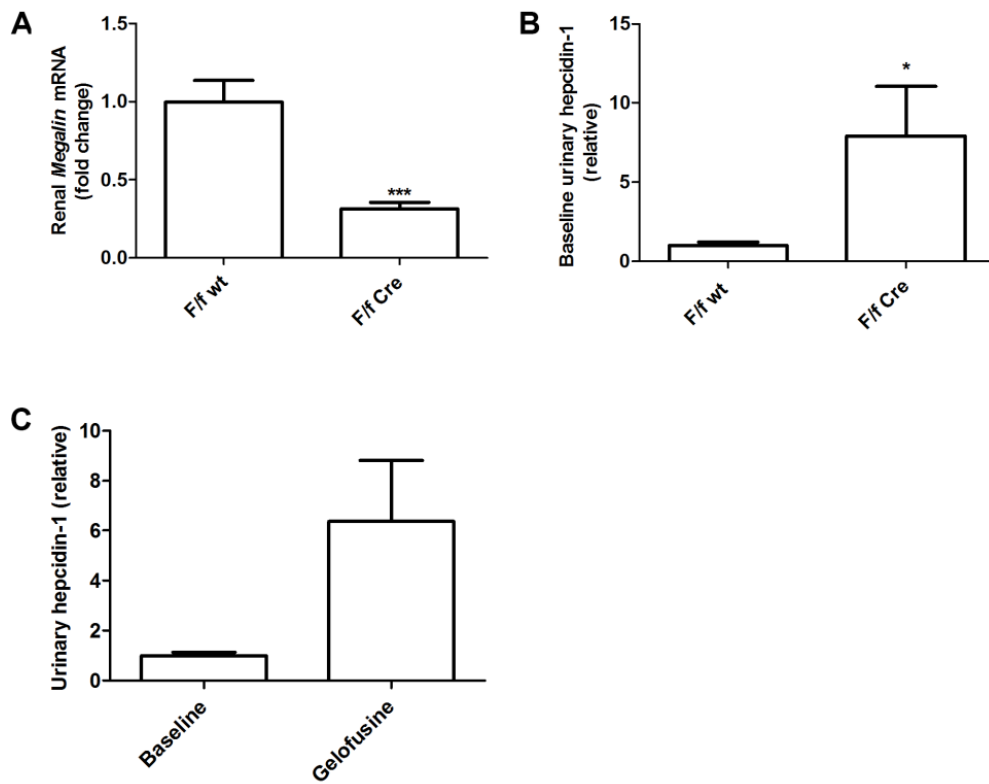

### Supplementary figure 1. Characterization of megalin deficiency in megalin<sup>f/f,Cre</sup> mice and after Gelofusin® treatment

Renal mRNA expression of *Megalin* in wildtype (f/f wt; n=4) and megalin<sup>f/f,Cre</sup> (f/f Cre; n=5) mice (A). Urinary excretion of hepcidin-1 in 24h baseline urine of megalin<sup>f/f,wt</sup> and megalin<sup>f/f,Cre</sup> mice (B) and 24h baseline urine and after Gelofusin® treatment (C).

\* = p<0.05; \*\*\* = p<0.001 using the Student's t-test.

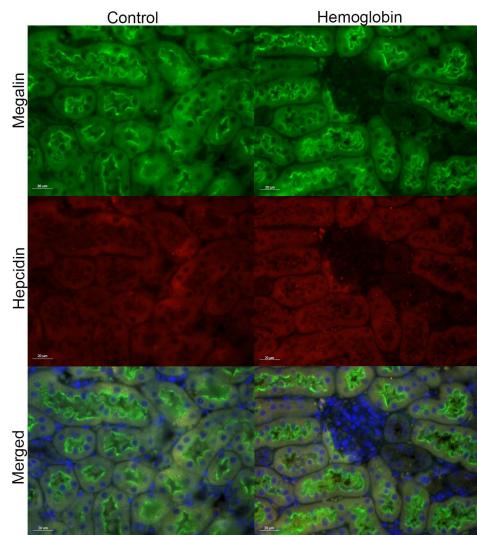

Supplementary figure 2. Hepcidin immunostaining in control and hemoglobin-treated mice.  
Scalebar = 20  $\mu$ m.
